# Supplementary material
Source: publisher figshare collection journal article supplement (https://tandf.figshare.com/articles/dataset/_/28638405)
Supplement: Supplementary file 1 [file 1]

**Supplement Table S1. Blood routine of OIR mice treated with Ctrl or SeNPs**

| **Ctrl** |  |  |  |
| --- | --- | --- | --- |
| **Test Item** | **Result** | **Unit** | **Reference Range** |
| White Blood Cell Count | 6.13 | 10^9/L | 1.05-10.60 |
| Neutrophil Count | 2.03 | 10^9/L | 0.62-7.60 |
| Lymphocyte Count | 3.73 | 10^9/L | 0.90-10.60 |
| Monocyte Count | 0.37 | 10^9/L | 0.04-1.40 |
| Neutrophil Percentage | 33.1 | % | 10.5-59.0 |
| Lymphocyte Percentage | 60.9 | % | 35.0-83.0 |
| Monocyte Percentage | 6 | % | 0.0-10.2 |
| Red Blood Cell Count | 7.8 | 10^12/L | 6.50-11.50 |
| Hemoglobin Concentration | 141 | g/L | 110-165 |
| Hematocrit | 36.6 | % | 33.1-53.0 |
| Mean Corpuscular Volume | 46.9 | fL | 41.0-55.0 |
| Mean Corpuscular Hemoglobin | 18.1 | pg | 13.0-18.0 |
| Mean Corpuscular Hemoglobin Concentration | 386 | g/L | 300-360 |
| Red Cell Distribution Width Coefficient | 19.4 | % | 13.0-23.0 |
| Red Cell Distribution Width Standard Deviation | 35.9 | fL | 25.0-48.0 |
| Platelet Count | 1286 | 10^9/L | 400-2300 |
| Mean Platelet Volume | 7.5 | fL | 4.5-7.7 |
| Platelet Distribution Width | 15.6 |  | 12.0-17.5 |
| Plateletcrit | 0.959 | % | 0.250-1.250 |
| Large Platelet Count | 713 | 10^9/L | 150-1000 |
| Large Platelet Ratio | 55.4 | % | 22.0-63.5 |
| **SeNPs** |  |  |  |
| **Test Item** | **Result** | **Unit** | **Reference Range** |
| White Blood Cell Count | 6.09 | 10^9/L | 1.05-10.60 |
| Neutrophil Count | 2.46 | 10^9/L | 0.62-7.60 |
| Lymphocyte Count | 3.22 | 10^9/L | 0.90-10.60 |
| Monocyte Count | 0.41 | 10^9/L | 0.04-1.40 |
| Neutrophil Percentage | 40.4 | % | 10.5-59.0 |
| Lymphocyte Percentage | 52.9 | % | 35.0-83.0 |
| Monocyte Percentage | 6.7 | % | 0.0-10.2 |
| Red Blood Cell Count | 8.79 | 10^12/L | 6.50-11.50 |
| Hemoglobin Concentration | 151 | g/L | 110-165 |
| Hematocrit | 40.1 | % | 33.1-53.0 |
| Mean Corpuscular Volume | 45.6 | fL | 41.0-55.0 |
| Mean Corpuscular Hemoglobin | 17.1 | pg | 13.0-18.0 |
| Mean Corpuscular Hemoglobin Concentration | 376 | g/L | 300-360 |
| Red Cell Distribution Width Coefficient | 19.9 | % | 13.0-23.0 |
| Red Cell Distribution Width Standard Deviation | 35.8 | fL | 25.0-48.0 |
| Platelet Count | 1413 | 10^9/L | 400-2300 |
| Mean Platelet Volume | 6.8 | fL | 4.5-7.7 |
| Platelet Distribution Width | 15.3 |  | 12.0-17.5 |
| Plateletcrit | 0.966 | % | 0.250-1.250 |
| Large Platelet Count | 686 | 10^9/L | 150-1000 |
| Large Platelet Ratio | 48.6 | % | 22.0-63.5 |
